# Supplementary material for: Effects of the Weather on the Seasonal Population Trend of <em>Aedes albopictus</em> (Diptera: Culicidae) in Northern Italy
Source: Preprints.org preprint supplement (doi:10.20944/preprints202307.0149.v1), 2023-07-04
Supplement: Supplementary file 1 [file supplementary]

## Sheet: S1
		standardized eggs/ovitraps/month
Year	Area	May	June	July	August	September	MJ	MJJ	MJJA	Seasonal	MEAN J_S	MAX	Frost Jan-May	Tmin	T3	R3	RH3	RAD3	LEAF3	T4	R4	RH4	RAD4	LEAF4	T5	R5	RH5	RAD5	LEAF5	T6	R6	RH6	RAD6	LEAF6	T7	R7	RH7	RAD7	LEAF7	T8	R8	RH8	RAD8	LEAF8	T9	R9	RH9	RAD9	LEAF9
2010	36023	0.619452	0.655057	0.680551	0.656394	0.487526	0.648916	0.668349	0.662771	0.632022	0.631799	300.226	40	1.02147	8.15806	3.06452	70.7613	11.8226	6.3871	13.59	1.98	65.23	18.46	3.7	17.6645	2.96129	64.1258	19.7806	5.45161	22.29	3.44333	62.0433	23.5133	2.93333	26.1065	0.503226	54.4419	25.6548	0.870968	23.4968	2.64194	63.1387	20.5097	2.74194	18.4267	1.55333	69.7733	14.5233	4
2011	36023	0.779678	0.961158	0.967704	1.3564	1.12889	0.929858	0.953107	1.14128	1.14017	1.14991	568.005	30	1.64021	9.1871	2.00968	68.4548	12.6129	6.67742	15.5333	0.42	58.44	19.3133	1.86667	19.4903	1.06452	54.7871	25.0548	1.06452	22.2833	3.11333	67.2233	22.26	4.63333	23.8903	0.545161	56.1226	24.4613	1.32258	26.3129	0	49.2226	22.7903	0.0322581	22.5267	0.686667	59.9833	16.5233	1.86667
2012	36023	0.674712	0.848977	0.966246	0.658207	0.410075	0.818921	0.909424	0.792212	0.724522	0.725328	426.261	45	-0.318947	11.8323	0.232258	57.1194	15.529	1.03226	12.7833	2.92333	69.9467	15.2	7.3	17.9871	2.19677	60.4387	21.7806	3.16129	24.33	0.183333	55.6267	25.0933	1.03333	26.4387	0.132258	47.7548	25.5581	0.483871	27	0.00645161	46.3065	22.4516	0.258065	19.91	2.63667	67.1233	13.7567	4.56667
2013	36023	0.304338	0.330588	0.434904	0.756854	0.635975	0.326061	0.392924	0.562725	0.5764	0.584017	316.939	33	1.02531	7.14194	5.25806	77.3903	9.14839	9.83871	13.8533	2.75333	71.2367	15.8533	6.8	16.8194	2.57742	65.5581	20.6774	6.48387	22.05	0.473333	55.69	24.6867	1.33333	26.0452	0.196774	52.1387	25.4032	0.548387	24.771	1.39355	53.8677	22.5484	1.48387	20.59	0.94	61.55	16.1067	2.16667
2014	36023	0.748715	0.550763	0.485269	0.89263	1.23495	0.584904	0.523698	0.695833	0.793105	0.793684	373.796	6	4.13859	10.8258	2.01613	69.0323	13.3935	5.6129	14.6667	3.62667	67.5033	16.6	5.2	17.9903	1.13226	57.3677	22.7	2.12903	22.9233	1.04	57.2233	24.03	1.76667	23.0355	3.55161	64.4419	21.2226	4.29032	22.8581	1.25806	65.6774	20.5516	2.6129	19.3833	2.28	71.7633	15.0267	2.76667
2015	36023	1.16238	1.25007	2.14971	1.01957	1.4374	1.23495	1.79689	1.43421	1.43619	1.44304	948.349	26	1.88249	9.66452	2.50323	68.3161	13.4677	5.22581	14.0067	1.53	59.3367	19.7633	3.9	18.7806	1.91613	66.8806	20.4194	4.6129	23.0833	1.91667	59.6067	25.6933	2.03333	27.9677	0.0548387	51.8968	25.6903	0.290323	25.0871	1.76774	56.5968	21.3258	2.19355	19.9867	0.686667	56.5033	15.2333	1.76667
2016	36023	0.312473	0.290983	0.57632	0.472522	0.84667	0.294689	0.467697	0.469948	0.537904	0.544158	254.244	18	2.76174	9.59677	2.54839	69.7742	12.3258	4.90323	14.6467	1.37667	65.96	17.5267	4.93333	17.5065	2.23226	64.5645	21.6323	4.32258	22.22	2.63	61.78	23.76	3.33333	26.0097	0.206452	55.3742	24.3516	0.419355	24.0677	1.22903	55.8742	22.5871	1.90323	21.27	0.786667	61.4867	16.5	1.63333
2017	36023	0.932754	0.903624	0.911913	1.00147	0.32769	0.908648	0.910654	0.953028	0.841922	0.838397	419.375	29	1.82949	12.071	0.345161	58.9323	15.5645	2.70968	14.22	1.4	62.8633	19.1967	2.9	18.729	1.94194	61.9065	22.329	3.29032	24.8933	0.82	53.81	25.4133	2.06667	26.029	0.170968	48.0323	26.471	0.290323	26.6935	0.0677419	46.8742	22.5065	0.225806	18.2733	3.09333	66.3933	15.0733	4.8
2018	36023	1.56093	0.999055	0.981407	1.1381	1.58059	1.09596	1.02559	1.07809	1.16917	1.15631	476.589	23	1.50733	7.23871	3.06129	74.0581	11.3581	9.32258	15.9733	0.43	62.5067	18.7033	2.96667	19.0226	2.34194	69.629	19.8355	4.83871	22.9967	2.29	58.24	25.0167	1.93333	25.6	1.77097	59.8	24.2968	2	25.5935	0.735484	56.2323	21.3452	1.32258	21.3733	0.703333	61.42	17.21	1.13333
2019	36023	0.369704	1.24749	1.25887	1.08952	1.29116	1.0961	1.19609	1.14637	1.17343	1.19644	555.351	31	1.08932	10.8194	0.216129	52.4419	16.4323	0.967742	13.3733	2.67	67.23	15.57	6.9	15.1323	7.38065	70.829	17.5871	9.70968	25.1133	1.21	53.9667	27.1667	1	25.7548	2.27419	58.3065	23.7516	2.22581	25.4097	1.41613	61.5	21.5677	1.51613	20.08	2.47667	67.1733	16.14	3.96667
2020	36023	1.40644	0.908744	0.846982	1.13496	1.64391	0.994581	0.90391	1.01171	1.12597	1.11649	482.491	20	2.30226	9.22258	1.04194	64.6548	13.1032	4.16129	14.35	0.946667	51.48	21.4333	1.93333	18.9516	0.53871	58.0903	22.6742	2.74194	22.0833	3.59667	59.71	25.1433	3.56667	24.971	1.94194	57.3516	25.6387	1.32258	25.3581	2.9	61.0065	21.3129	2.22581	20.8267	2.20333	63.74	17.4033	2.9
2021	36023	2.0112	2.04997	1.50964	1.54472	1.15198	2.04328	1.71546	1.6358	1.53799	1.53467	665.979	27	1.75111	9.57097	0.0258065	53.5484	16.5581	0.548387	11.8033	2.02	62.3533	16.98	4.63333	17.171	1.79677	60.7742	23.2226	3.48387	24.47	0.753333	52.8767	26.0733	0.933333	25.6129	0.683871	56.2323	23.4387	1.48387	24.8194	0.445161	51.8	21.4129	0.806452	21.0333	0.793333	59.9667	16.6633	2.43333
2022	36023	2.11723	2.00351	1.23049	1.27864	0.82319	2.02313	1.5362	1.41603	1.3112	1.28577	542.831	46	0.234562	7.96129	0.583871	57.3097	15.4065	1.58065	11.99	2.72333	66.3167	19.8267	4.13333	20.2742	2.09032	62.5194	21.4258	3.3871	25.38	0.713333	55.4433	24.54	1.33333	27.5645	0.696774	46.9161	26.8452	0.451613	25.8452	1.75161	53.3935	22.1548	2.32258	20.3367	1.31667	62.76	16.2467	3.03333
2010	37006	0.99173	0.825005	0.860163	0.803922	0.739546	0.853856	0.857727	0.831566	0.816649	0.811249	383.77	27	2.52588	8.93871	3.05806	66.2806	10.5387	6.06452	14.14	2.41333	59.1833	16.4067	3.2	18.0355	3.32581	57.5742	18.3871	4.35484	22.6733	3.35333	55.1067	22.1367	2.63333	26.4516	0.948387	49.2839	24.029	1.19355	24.029	2.34516	56.1742	19.0452	2.19355	18.9733	2.54667	63.1433	13.6833	2.86667
2011	37006	0.767927	0.900541	0.715432	1.18454	1.4692	0.877593	0.778083	0.975705	1.05729	1.06555	543.332	18	3.02623	9.58387	2.26129	63.2419	11.3548	5.80645	16.12	0.72	51.68	17.6333	1.86667	19.7968	1.07742	48.4097	23.7097	1.06452	22.6733	2.74	58.81	21.2167	3.6	24.2839	2.32581	50.1645	22.6677	1.80645	26.9161	0	42.3452	21.5355	0	23.3067	0.596667	52.6633	15.29	1.26667
2012	37006	0.890194	0.864656	0.822992	0.682793	0.721118	0.869075	0.840796	0.763973	0.757137	0.752994	367.185	29	2.1809	13	0.26129	50.5806	14.4774	0.741935	13.4667	3.04	64.9	14.9767	8.63333	18.3677	3.21935	55.4355	20.8161	3.19355	25.01	0.22	47.89	24.6267	0.866667	27.3065	0.0258065	40.1065	24.4323	0.290323	27.6355	0.0612903	40.6355	21.8419	0.290323	20.45	3.88	62.7	12.99	3.23333
2013	37006	0.520615	0.676629	0.732919	0.869751	0.939154	0.649631	0.700741	0.782916	0.808885	0.817175	398.944	12	2.34843	7.76129	5.16774	79.0548	8.44194	10.9677	14.3433	3.16333	68.6067	14.73	5.2	17.3	2.91935	63.0323	18.7774	4.58065	22.3533	0.903333	51.9667	23.8733	1.43333	26.2419	0.222581	47.7871	23.771	0.354839	25.2968	0.903226	48.171	20.9226	1.12903	21.26	0.983333	56.3633	14.95	1.66667
2014	37006	0.431835	0.329466	0.444549	0.868977	1.03005	0.34718	0.40693	0.631583	0.697414	0.705065	398.589	0	5.61651	11.6355	2.59032	64.1516	12.3097	4	15.2167	3.12333	65.6033	15.6767	5.4	18.2774	1.69032	52.9677	20.6839	2.77419	23.1533	2.58667	53.7667	22.6267	2.13333	23.2935	3.79355	61.529	20.2258	4.16129	23.6871	0.793548	57.871	19.2645	1.74194	19.6333	3.21	70.2367	13.2433	3.26667
2015	37006	0.673314	1.09658	1.66425	1.04275	1.00557	1.02334	1.41664	1.23485	1.19743	1.21258	742.521	7	3.72074	10.2161	3.45161	65.0065	12.171	5.09677	14.62	3.32333	54.2533	18.2467	3.73333	19.0645	2.06774	63.1323	19.0226	5.06452	23.45	2.52	54.0333	24.4367	1.8	28.3065	0.0677419	46.9516	24.2742	0.387097	25.4323	2.54194	53.871	20.6129	1.77419	20.7167	0.45	51.7033	13.6667	1
2016	37006	0.533979	0.526339	0.773072	0.789659	1.24192	0.527661	0.678258	0.732422	0.816575	0.824695	362.207	6	4.6739	10.3516	2.44839	67.8194	10.8	5.22581	15.3467	1.67333	64.31	16.3733	4.6	18.0581	2.27419	61.0065	20.6258	4	22.7467	1.80333	58.28	22.02	2.8	26.5742	0.222581	50.6065	22.7742	0.741935	24.5903	1.37419	52.8226	21.1548	1.54839	22.03	1.18333	57.5267	15.2933	1.5
2017	37006	1.20107	1.12875	1.21536	1.10568	0.659588	1.14126	1.18673	1.14732	1.0673	1.06305	542.242	21	3.91267	13.0387	0.309677	55.5258	14.5613	1.67742	15.1367	1.37	59.17	19.0267	2.2	19.3548	3.06774	58.6968	21.3452	3.22581	25.53	1.04333	49.8567	23.9133	1.33333	26.7258	0.216129	44.5484	24.5968	0.16129	27.2774	0.825806	44.5581	21.6935	0.419355	18.9333	3.24	63.9267	14.0067	4.23333
2018	37006	2.37103	1.2057	1.22279	1.29537	1.57704	1.40735	1.2941	1.29471	1.34161	1.31082	594.169	11	3.17143	8.12258	3.35806	72.0387	10.3097	9.06452	16.9367	0.453333	58.9567	17.5433	2.3	19.5419	2.6871	68.4903	18.5839	4.09677	23.5767	2.76667	54.3833	23.98	1.46667	26.1548	1.66452	56.9194	22.9645	1.16129	26.0419	1.05484	54.1645	20.3548	1.51613	21.9267	0.863333	60.0333	16.1	1.36667
2019	37006	0.238493	0.741538	1.08507	0.927035	0.868825	0.654489	0.918715	0.922761	0.914145	0.933848	484.114	15	3.64962	12.171	0.422581	50.2065	14.7194	0.677419	13.9833	2.08667	64.14	15.1233	4.8	15.4387	6.25806	70.2968	15.9065	8.3871	25.8467	0.97	50.2	25.96	0.366667	26.4032	1.38387	55.6742	22.271	2	26.1452	0.741935	57.929	20.3226	1.29032	20.8733	1.59	64.0333	14.6833	4.06667
2020	37006	1.22666	1.25324	1.0516	1.26836	1.23405	1.24864	1.12773	1.19611	1.20271	1.20166	581.782	4	4.6092	9.9871	0.835484	63.7258	11.8903	3.74194	15.2933	0.923333	46.98	19.93	1.93333	19.4742	1.18065	55.5548	21.1419	2.35484	22.78	2.52	56.4967	23.7833	3	25.4806	0.696774	56.471	24.6581	1.83871	26.1548	1.07742	60.4258	20.2645	1.96774	21.6333	1.80667	63.9367	16.6433	3.5
2021	37006	1.37093	1.19199	1.05032	1.0492	0.689592	1.22295	1.11702	1.08404	1.01557	1.00842	481.255	8	3.91843	10.5097	0.235484	51.9871	15.7935	0.548387	12.3267	1.78333	60.8633	16.0267	4.23333	17.8516	1.10968	57.7935	22.4258	2.74194	25.2	0.88	49.7433	26.1633	0.966667	26.7226	0.341935	50.8968	23.0677	1	25.6968	0.3	48.7258	20.8613	1.03226	21.6933	2.65	58.74	16.3567	1.6
2022	37006	1.78222	2.25957	1.36148	1.11197	0.82435	2.17697	1.67654	1.40204	1.30728	1.29288	607.437	10	3.29025	9.40968	1.7	52.2774	14.4032	0.83871	13.5067	3.57	57.6933	19.2633	2.63333	21.1129	1.77742	60.3548	20.5742	3.48387	26.2433	0.7	52.9	23.5067	0.533333	28.3355	0.245161	45.3645	26.1677	0.387097	26.471	1.93226	52.8484	20.8677	1.77419	21.36	1.15333	60.9733	14.68	2.43333
2010	40007	0.393354	0.58966	0.713166	0.538909	0.430958	0.556619	0.649291	0.596895	0.569329	0.573408	294.584	26	2.25661	8.95161	3.75806	68.6677	11.571	5.6129	13.1633	2.72333	66.1067	17.7733	4.63333	17.4871	3.60645	62.1968	19.5871	5.29032	21.5033	3.61	60.36	23.9067	2.4	25.0516	0.690323	57.1194	24.7742	1.16129	23.1323	1.38387	61.0677	20.8129	2.35484	18.5067	2.63333	69.38	15.1967	3.86667
2011	40007	0.397379	0.350373	0.357516	0.432458	0.427079	0.358285	0.35783	0.393254	0.40004	0.399189	181.778	20	2.21402	8.8	3.61935	67.1645	12.9645	6.64516	14.9267	0.963333	59.0167	19.5567	3	18.3935	1.40645	57.9935	24.8903	2.19355	22.1133	1.63667	62.4133	23.29	2.7	23.7581	1.3129	54.7645	23.4774	1.96774	25.5645	0	49.1839	23.4097	0	22.4767	1.28333	58.8367	16.5033	1.16667
2012	40007	1.09327	0.894778	0.919095	0.692542	1.11186	0.928186	0.922804	0.813504	0.867344	0.858382	379.646	37	1.05795	11.7452	0.606452	56.6484	16.2452	1.19355	13.3	2.26333	65.56	16.5133	5.83333	17.2839	1.64194	60.7323	21.8065	2.64516	24.0967	0.333333	51.9133	26.0933	0.966667	26.4419	0.341935	44.7194	25.7065	0.677419	26.0194	0.412903	46.2742	23.0581	0.451613	20.0133	3.51	67.0533	13.3633	3.66667
2013	40007	0.665318	1.07224	1.11474	1.07557	1.23121	1.00375	1.06946	1.07236	1.10247	1.11333	460.462	10	2.41966	8.23226	3.57742	75.5613	9.42581	8.6129	14.0133	1.91667	67.9033	17.13	3.26667	16.8355	1.73548	64.7548	18.7871	4.74194	21.5533	0.786667	54.92	24.3233	1.43333	24.9355	0.535484	53.3065	25.2774	0.645161	24.2677	3.11935	53.971	22.1968	1.3871	20.2233	1.07	61.9067	16.9767	1.9
2014	40007	0.768934	0.628589	0.733937	1.20194	1.52102	0.652211	0.70059	0.938571	1.0422	1.04817	505.221	0	5.11959	10.8097	2.90968	67.5129	13.4419	3.90323	14.3767	2.53	67.37	16.93	4.4	17.3968	1.72581	57.5484	21.3097	2.74194	22.2133	3.96	58.01	24.9067	2.53333	22.5677	3.44516	64.9484	21.3032	3.80645	22.9258	1.51613	62.7645	21.6419	1.29032	18.66	4.12	73.9767	14.25	3.96667
2015	40007	0.513799	1.52041	1.845	1.23275	1.23569	1.35098	1.64343	1.44849	1.41468	1.43906	762.106	9	3.29236	9.74839	3.94516	68.2129	12.529	4.83871	13.6967	3.94	57.82	19.1633	3.56667	18.6387	4.23226	63.9806	20.5839	4.29032	22.5033	1.11667	57.94	25.8067	1.53333	27.329	0.0903226	51.5968	25.9581	0.290323	24.3387	1.42258	59.9516	21.0839	1.83871	20.1633	1.22333	58.8033	14.76	1.9
2016	40007	0.511805	0.555363	0.893976	1.09306	1.26327	0.548031	0.752821	0.914325	0.977208	0.989228	459.454	13	4.29169	9.95806	2.68065	69.2161	11.2387	5.93548	14.32	2.22667	66.3867	16.52	5.33333	17.3258	2.02903	62.0065	22.1355	4.19355	21.65	1.92667	62.64	22.62	3.5	25.3065	1.31613	54.6161	24.2581	1.09677	22.9419	0.887097	59.2613	22.5742	1.35484	20.3533	2.51	64.6667	16.26	2.33333
2017	40007	0.993512	0.953473	0.988998	0.820101	0.737611	0.960212	0.977253	0.902657	0.875939	0.870286	408.521	20	2.79224	11.8387	0.541935	56.4065	15.9935	1.93548	14.0533	1.37	60.5267	20.1333	2.5	18.2839	2.34194	61.1194	23.4355	2.54839	24.3067	0.65	49.8367	25.61	0.833333	25.4129	0.112903	47.0032	25.7194	0.322581	25.8065	0.403226	47.829	22.6903	0.580645	18.64	2.31333	64.6967	14.8967	4.3
2018	40007	1.69984	1.41901	1.35929	1.59095	1.60502	1.46628	1.40294	1.49218	1.51523	1.50603	668.733	13	2.58088	8.07742	2.36774	68.2387	11.5194	7.22581	15.7667	0.73	61.0067	19.3133	2.16667	18.8323	3.08065	69.5194	19.7161	3.96774	22.2867	1.82333	58.4533	24.7267	1.96667	25.0742	1.24516	57.6226	24.9194	1.45161	24.8484	0.874194	56.6903	21.1258	1.09677	20.5933	1.63333	64.9467	16.8567	2.03333
2019	40007	0.284545	0.94461	1.03194	1.32256	0.928522	0.833512	0.950978	1.12736	1.09526	1.11761	555.919	19	2.44766	11.3774	0.790323	51.1516	15.7742	1.58065	13.1833	1.59	62.9867	16.9567	3.46667	15.0065	6.90968	69.9097	17.0581	8.74194	24.3733	0.676667	54.86	26.5733	0.766667	25.2355	1.90968	58.6613	24.2548	2.22581	25.1613	0.751613	62.1774	21.3355	0.774194	20.0867	2.08	67.1633	16.3067	4.06667
2020	40007	2.31601	0.849397	0.931777	1.18234	0.644504	1.09625	0.998886	1.08597	1.01149	0.969062	496.982	8	3.52555	9.41613	1.22258	67.8258	12.6548	3.45161	13.85	0.91	51.65	21.3633	2.16667	18.4065	0.464516	60.3871	22.1226	1.54839	22.15	1.36333	56.99	24.1467	2.03333	24.3161	0.696774	56.7129	25.3806	1.45161	25.5161	1.00968	60.9774	20.5065	1.67742	20.86	2.84	66.8767	17.3133	3.9
2021	40007	1.24089	1.32139	1.17229	1.04218	1.18235	1.30784	1.2276	1.13959	1.12016	1.14414	484.231	14	2.93483	9.51935	0.632258	56.3161	16.4903	1.3871	11.7	1.89	63.9633	17.0967	4.13333	17.6323	0.9	53.0581	22.2968	1.87097	24.2533	0.23	51.03	25.7067	0.8	25.7935	0.716129	50.3129	22.6677	0.935484	24.8677	0.545161	49.1129	21.5742	1.12903	20.5867	1.12333	61.8367	16.5767	1.93333
2022	40007	2.12135	1.90071	0.938271	0.774634	0.680915	1.93785	1.34613	1.07485	1.00864	0.972102	450.074	22	2.04098	7.96774	1.04839	55.9935	15.1935	1.25806	12.3467	2.69	60.2467	19.6933	2.63333	19.7129	0.96129	63.2419	22.2742	2.93548	24.6567	0.166667	56.6067	24.0167	0.7	26.3419	0.132258	51.1097	26.7	0.354839	24.9	1.62258	59.4065	21.2	2	20.41	3.56	65.4167	15.4467	4.3
2010	40012	0.620448	0.558357	0.462268	0.427571	0.342607	0.570075	0.506942	0.469176	0.452485	0.446353	222.58	31	2.02346	8.95484	3.54839	72.0194	11.5774	5.96774	13.2667	2.99333	69.8333	17.6067	5.06667	17.6419	3.84516	64.571	20.2355	5.22581	21.79	1.55	61.84	24.2333	2.56667	25.3903	1.40323	58.3419	24.9871	1.48387	23.3516	1.95806	63.1645	20.6419	2.64516	18.4233	5.15333	73.9167	14.8433	5.5
2011	40012	0.425105	0.47369	0.376153	0.404748	0.417807	0.46452	0.412771	0.408954	0.415813	0.415306	201.393	25	1.92765	8.8871	3.4871	70.6968	12.8968	7.06452	14.9667	0.823333	61.9233	19.0967	3.2	18.529	1.76129	58.971	25.171	2.25806	22.2733	1.64333	64.37	23.5067	3.43333	23.8484	1.22903	56.5452	24.2161	1.90323	25.7548	0	50.2097	23.4613	0	22.4967	1.59	61.5667	16.75	1.23333
2012	40012	0.669842	1.09692	0.717566	0.734554	1.04187	1.01631	0.841364	0.790541	0.845872	0.851732	365.496	43	0.526659	11.6484	0.764516	60.6645	15.9871	1.22581	13.2867	2.08333	69.1333	16.17	6.9	17.429	2.21613	63.9194	21.7645	3.58065	24.2067	0.346667	54.35	26.6233	1.26667	26.5871	1.33226	46.4613	25.7419	0.580645	26.329	0.354839	47.5677	23.0871	0.225806	20.0133	3.19	70.7367	13.6333	4.66667
2013	40012	0.240389	0.632348	0.603267	0.713645	0.985153	0.558371	0.584663	0.646035	0.715274	0.731755	355.092	20	2.05856	7.95161	4.02258	81.6806	9.23548	12.0323	14.0433	1.54667	71.85	16.5933	4.66667	16.9323	1.59032	68.8839	19.6516	6.51613	21.7433	0.523333	57.49	25.34	1.56667	25.1258	0.377419	55.5387	25.6	0.677419	24.2968	2.70323	56.9419	22.1516	1.80645	20.4467	1.44	65.0933	16.95	2.56667
2014	40012	0.555308	0.444239	0.603082	0.889827	0.862911	0.465202	0.545946	0.709572	0.746258	0.752688	442.756	2	4.90131	10.8355	2.65161	71.9452	13.4806	4.64516	14.5267	2.05667	71.0867	16.8167	6.26667	17.5226	2.51613	60.7903	21.8194	3.19355	22.4433	4.45333	61.2733	25.0467	2.96667	22.6968	2.65161	68.2935	21.5581	5.48387	23.2065	1.2129	64.7355	21.4355	1.80645	18.7933	3.46333	77.86	14.1533	5.96667
2015	40012	0.467262	1.1965	1.46256	0.86893	0.934219	1.05887	1.29528	1.09241	1.07807	1.0992	704.218	16	2.99412	9.69355	3.83548	72.4806	12.8677	6.29032	13.9333	3.68667	60.1367	19.2633	4.56667	18.7323	4	66.8032	20.4548	6.03226	22.7467	0.73	60.73	26.4333	1.96667	27.6065	0	52.5742	26.0613	0.0645161	24.5645	2.42581	62.9323	21.3323	2.41935	20.1067	1.35	62.0133	14.2733	2.8
2016	40012	0.3386	0.48169	0.702428	0.810509	1.06515	0.454684	0.599766	0.700042	0.774646	0.789728	403.289	14	4.15465	10.0419	2.60645	74.071	11.271	7.54839	14.66	1.68667	69.9767	16.26	7.7	17.4387	1.69355	67.7742	21.9968	6.48387	21.91	1.46	65.8133	23.3833	4.63333	25.5806	0.764516	57.0968	24.2323	2.09677	23.2677	1.40645	62.4548	22.3065	3.06452	20.6767	1.2	68.7833	16.2633	4.06667
2017	40012	1.09292	0.940766	1.38507	1.22965	0.425384	0.969483	1.21286	1.22085	1.09369	1.09324	666.907	21	2.67139	11.8677	0.964516	63.8065	15.7581	3.06452	14.1867	1.38667	66.7733	19.59	3.13333	18.5903	1.57097	65.2387	23.4645	3.25806	24.7033	1.1	53.81	26.0067	1	25.7129	0.325806	52.0161	26.8419	0.451613	26	1.06452	52.2452	22.7	0.322581	18.62	2.65667	70.0433	15.14	5.6
2018	40012	2.60543	1.54194	1.61761	1.60863	1.19865	1.74266	1.66943	1.6405	1.58227	1.54541	800.413	15	2.65084	8.12903	2.05806	72.8226	11.1839	7.90323	15.9733	0.466667	65.1867	19.0733	2.33333	18.9677	1.84194	72.1645	20.0065	4.48387	22.59	3.05	61.4467	25.35	2.13333	25.3452	1.27097	60.9	24.9355	1.77419	25.1484	1.50323	59.9129	21.6452	1.45161	20.7	1.90333	68.11	16.9167	2.66667
2019	40012	0.266642	1.12876	1.18605	1.32939	1.27714	0.966048	1.09488	1.20647	1.23471	1.2684	661.471	22	2.22354	11.4935	0.641935	57.6839	15.7387	1.45161	13.3933	1.41667	66.93	16.82	4.33333	15.1871	7.04516	72.2355	17.3742	9.16129	24.64	0.686667	57.0733	26.9933	0.866667	25.5323	1.44516	59.2452	24.429	2.54839	25.3484	0.432258	62.129	21.2161	0.967742	20.22	1.32	66.9867	16.0967	4.16667
2020	40012	1.78912	1.05635	1.0488	1.64095	1.4292	1.19465	1.10924	1.36224	1.35083	1.33475	816.497	18	3.29084	9.41935	0.758065	67.5194	12.7903	3.90323	14.0033	0.773333	52.54	21.3133	2.13333	18.5452	0.603226	60.1806	21.9839	2.16129	22.3433	1.34333	57.29	24.99	1.86667	24.5	0.796774	57.0839	25.6097	1.58065	25.5871	1.17742	60.5806	20.9355	1.41935	20.9967	1.22333	63.6533	17.4767	2.43333
2021	40012	1.32998	1.33404	1.19042	1.10936	2.10334	1.33328	1.24962	1.18288	1.23696	1.23873	711.233	17	2.56248	9.43226	0.287097	57.6548	16.1258	1.48387	11.7267	2.28667	64.4467	16.7	5.03333	17.4806	1.33226	57.9065	23.0323	2.41935	24.2433	0.626667	55.1333	26.3033	0.833333	25.6742	0.941935	54.6	23.1581	1.25806	24.8613	0.635484	52.4903	21.6129	1.35484	20.5167	1.45333	63.8733	16.3433	2.83333
2022	40012	2.59896	2.1144	1.64471	1.23225	0.916567	2.20585	1.87724	1.57034	1.47313	1.4327	791.922	28	1.67788	7.9129	1.06774	59.0452	14.9387	1.48387	12.4033	2.38	61.6867	19.8767	2.76667	20.0097	1.62903	62.9742	22.2032	2.93548	24.8233	0.273333	57.3467	24.3367	0.933333	26.6129	0.109677	51.4968	26.9903	0.387097	24.9645	1.88065	59.271	21.8903	2.3871	20.38	2.63	66.1867	15.22	5.03333
[truncated: 10 more columns]

## Sheet: S2 - TAB 2
Model Comparison							Posterior Summaries of Coefficients									Posterior Coefficients with 95% Credible Interval							Inclusion Probabilities										Model Probabilities									Posterior Log Odds
Models	P(M)	P(M|data)	BFM	BF10	R²								95% Credible Interval
Null model (incl. T3, R3, T5, RH5, Frost)	0.05	0.02	0.49	1	0.54		Coefficient	Mean	SD	P(incl)	P(incl|data)	BFinclusion	Lower	Upper
R7 + T9 + RH9	0.05	0.25	7.16	11.08	0.66		Intercept	1	0.03	1	1	1	0.95	1.05
RH7 + T9 + RH9	0.05	0.14	3.28	5.9	0.65		T3	-0.08	0.03	1	1	1	-0.13	-0.03
T9 + RH9	0.05	0.1	2.3	4.31	0.62		R3	-0.16	0.02	1	1	1	-0.21	-0.11
RH9	0.05	0.07	1.66	3.19	0.59		T5	0.07	0.02	1	1	1	0.02	0.12
Nota. All models include T3, R3, T5, RH5, Frost.							RH5	0.03	0.01	1	1	1	0.01	0.04
							R7	0.08	0.04	0.14	0.31	2.9	0	0.15
							T9	-0.08	0.03	0.41	0.69	3.29	-0.15	-0.01
							RH9	-0.03	0.01	0.77	0.94	4.78	-0.05	-0.01
							Frost	-0.01	0	1	1	1	-0.01	0

## Sheet: S3 TAB 5
Model Comparison							Posterior Summaries of Coefficients										Posterior Coefficients with 95% Credible Interval									Posterior Log Odds								Model Probabilities								Inclusion Probabilities
Models	P(M)	P(M|data)	BFM	BF10	R²								95% Credible Interval
Null model (incl. T3, R3, Frost)	0.08	0	0	1	0.59		Coefficient	Mean	SD	P(incl)	P(incl|data)	BFinclusion	Lower	Upper
T5 + RH5	0.08	0.66	23.26	63817.4	0.79		Intercept	1	0.05	1	1	1	0.91	1.09
T5 + RAD5	0.08	0.15	2.1	14431.6	0.77		T3	-0.26	0.04	1	1	1	-0.34	-0.18
T5	0.08	0.13	1.85	12948.7	0.75		R3	-0.36	0.04	1	1	1	-0.44	-0.27
Nota. All models include T3, R3, Frost.							T5	0.27	0.04	0.46	1	7955.11	0.18	0.35
							RH5	0.03	0.01	0.08	0.66	23.26	0.01	0.05
							Frost	-0.01	0	1	1	1	-0.02	0

## Sheet: S4 TAB 6
Model Comparison							Posterior Summaries of Coefficients									Posterior Coefficients with 95% Credible Interval							Posterior Log Odds							Model Probabilities							Inclusion Probabilities
Models	P(M)	P(M|data)	BFM	BF10	R²								95% Credible Interval
Null model	0.1	0	0	1	0		Coefficient	Mean	SD	P(incl)	P(incl|data)	BFinclusion	Lower	Upper
T5 + R5 + R6 + RAD6 + M	0.1	0.5	9.1	4.28092e+09	0.74		Intercept	1	0.04	1	1	1	0.93	1.07
T5 + R5 + RH5 + R6 + RAD6 + M	0.1	0.2	2.29	1.72505e+09	0.75		T5	0.16	0.04	0.6	0.99	120.05	0.07	0.25
T5 + R5 + T6 + R6 + RAD6 + M	0.1	0.19	2.1	1.61194e+09	0.75		R5	0.11	0.03	0.4	0.96	35.28	0.05	0.16
							R6	-0.1	0.03	0.7	1	943.99	-0.16	-0.03
							RAD6	0.07	0.04	0.4	0.92	18.42	0	0.14
							M	0.4	0.07	0.9	1	9.45993e+08	0.25	0.54

## Sheet: S5 TAB 7
Model Comparison							Posterior Summaries of Coefficients									Posterior Coefficients with 95% Credible Interval							Posterior Log Odds						Model Probabilities						Inclusion Probabilities
Models	P(M)	P(M|data)	BFM	BF10	R²								95% Credible Interval
Null model	0.06	0	0	1	0		Coefficient	Mean	SD	P(incl)	P(incl|data)	BFinclusion	Lower	Upper
T6 + R6 + RAD6 + MG + T7	0.06	0.24	4.67	4.33892e+08	0.71		Intercept	1	0.03	1	1	1	0.94	1.06
R6 + RH6 + RAD6 + MG + T7	0.06	0.15	2.71	2.79597e+08	0.7		T6	-0.04	0.03	0.44	0.64	2.25	-0.11	0.02
R6 + RAD6 + MG + T7 + RAD7	0.06	0.12	2.05	2.19905e+08	0.7		R6	0.08	0.03	0.25	0.62	4.86	0.01	0.15
							RAD6	0.09	0.03	0.75	1	1.16939e+06	0.04	0.14
							MG	0.46	0.08	0.69	1	78596	0.31	0.61
							T7	0.11	0.03	0.81	1	3.53249e+07	0.06	0.17

## Sheet: S6 TAB 8
Model Comparison							Posterior Summaries of Coefficients									Posterior Coefficients with 95% Credible Interval						Posterior Log Odds						Model Probabilities						Inclusion Probabilities
Models	P(M)	P(M|data)	BFM	BF10	R²								95% Credible Interval
Null model	0.09	0	0	1	0		Coefficient	Mean	SD	P(incl)	P(incl|data)	BFinclusion	Lower	Upper
T7 + MGL	0.09	0.42	7.3	2.09579e+09	0.66		Intercept	1	0.03	1	1	1	0.95	1.05
T7 + RAD8 + MGL	0.09	0.17	2.01	8.32731e+08	0.67		T7	-0.13	0.02	0.55	0.99	102.75	-0.17	-0.08
T7 + T8 + MGL	0.09	0.15	1.7	7.23508e+08	0.67		MGL	0.73	0.08	0.91	1	4.96723e+08	0.58	0.89

## Sheet: S7 TAB 9
Model Comparison							Posterior Summaries of Coefficients									Posterior Coefficients with 95% Credible Interval						Posterior Log Odds						Model Probabilities						Inclusion Probabilities
Models	P(M)	P(M|data)	BFM	BF10	R²								95% Credible Interval
Null model	0.04	0	0.01	1	0		Coefficient	Mean	SD	P(incl)	P(incl|data)	BFinclusion	Lower	Upper
T8 + RH8 + T9 + MGLA	0.04	0.23	7.08	390.42	0.4		Intercept	1	0.04	1	1	1	0.91	1.09
T8 + T9 + RAD9 + MGLA	0.04	0.22	6.93	383.82	0.4		T8	-0.12	0.06	0.48	0.89	8.63	-0.24	-0.01
T8 + T9 + R9 + RH9 + MGLA	0.04	0.1	2.73	174.87	0.41		RH8	0	0.01	0.32	0.42	1.54	-0.02	0.02
							T9	0.12	0.04	0.56	0.9	6.73	0.04	0.19
							MGLA	0.56	0.15	0.76	0.99	39.38	0.27	0.85
